# Supplementary material
Source: PubMed Central journal article supplement (PMC7058211)
Supplement: VaccaroFleming_SupplementaryMaterials.pdf [file VaccaroFleming_SupplementaryMaterials.pdf]

## Supplementary Materials

**Table S1.** Table of publications included in the meta-analysis

| Reference                                                                                                                                                                                                                                                                                          | N subjects | Contrast                                                                                                 | Domain   | Temporal focus | Analysis type             | Judgment type | Sign of parametric activation / correlation | Structural/functional | MNI/T88 |
|----------------------------------------------------------------------------------------------------------------------------------------------------------------------------------------------------------------------------------------------------------------------------------------------------|------------|----------------------------------------------------------------------------------------------------------|----------|----------------|---------------------------|---------------|---------------------------------------------|-----------------------|---------|
| Allen, M., Glen, J. C., Müllensiefen, D., Schwarzkopf, D. S., Callaghan, M. F., & Rees, G. (2017). Metacognitive ability predicts hippocampal and prefrontal microstructure. <i>NeuroImage</i> , 149(1), 415–423.                                                                                  | 48         | Whole Brain Results, Table 2                                                                             | Decision | Retrospective  | Metacognitive sensitivity | Confidence    | N/A                                         | Struc                 | MNI     |
| Baird, B., Smallwood, J., Gorgolewski, K. J., & Margulies, D. S. (2013). Medial and Lateral Networks in Anterior Prefrontal Cortex Support Metacognitive Ability for Memory and Perception. <i>Journal of Neuroscience</i> , 33(42), 16657–16665.                                                  | 52         | Connectivity with medial and lateral aPFC for memory, Table 1                                            | Memory   | Retrospective  | Metacognitive sensitivity | Confidence    | Pos                                         | Func                  | MNI     |
|                                                                                                                                                                                                                                                                                                    |            | Connectivity with medial and lateral aPFC for perception, Table 1                                        | Decision | Retrospective  | Metacognitive sensitivity | Confidence    | Pos                                         | Func                  | MNI     |
|                                                                                                                                                                                                                                                                                                    |            | Differential connectivity with medial and lateral aPFC, Table 2                                          | Memory   | Retrospective  | Metacognitive sensitivity | Confidence    | N/A                                         | Func                  | MNI     |
| Baird, B., Cieslak, M., Smallwood, J., Grafton, S. T., & Schooler, J. W. (2015). Regional white matter variation associated with domain-specific metacognitive accuracy. <i>Journal of Cognitive Neuroscience</i> , 27(3), 440–452.                                                                | 38         | White matter microstructure associated with metacognitive ability in perception, Table 1                 | Decision | Retrospective  | Metacognitive sensitivity | Confidence    | Pos                                         | Struc                 | MNI     |
|                                                                                                                                                                                                                                                                                                    |            | White matter microstructure associated with metacognitive ability in memory, Table 1                     | Memory   | Retrospective  | Metacognitive sensitivity | Confidence    | Pos                                         | Struc                 | MNI     |
| Chen, J., Feng, T., Shi, J., Liu, L., & Li, H. (2013). Neural representation of decision confidence. <i>Behavioural Brain Research</i> , 245, 50–57.                                                                                                                                               | 20         | Brain regions exhibiting significant activation in association with decision confidence process, Table 1 | Decision | Retrospective  | Parametric                | Confidence    | Pos, Neg                                    | Func                  | T88     |
| Chua, C., Rand-Giovannetti, E., Schacter, D. L., Albert, M. S., Chua, E. F., & Sperling, R. A. (2004). Dissociating Confidence and Accuracy: Functional Magnetic Resonance Imaging Shows Origins of the Subjective Memory Experience. <i>Journal of Cognitive Neuroscience</i> , 16(7), 1131–1142. | 16         | HC correct vs. LC correct, Table 3                                                                       | Memory   | Retrospective  | Parametric                | Confidence    | Pos                                         | Func                  | MNI     |
|                                                                                                                                                                                                                                                                                                    |            | HC incorrect vs. LC incorrect, Table 3                                                                   | Memory   | Retrospective  | Parametric                | Confidence    | Pos                                         | Func                  | MNI     |

|                                                                                                                                                                                                                                                              |    |                                                          |          |                       |                   |                               |     |      |     |
|--------------------------------------------------------------------------------------------------------------------------------------------------------------------------------------------------------------------------------------------------------------|----|----------------------------------------------------------|----------|-----------------------|-------------------|-------------------------------|-----|------|-----|
| Chua, E. F., Schacter, D. L., Rand-Giovannetti, E., & Sperling, R. A. (2006). Understanding metamemory: Neural correlates of the cognitive process and subjective level of confidence in recognition memory. <i>NeuroImage</i> , 29.                         | 20 | Conf HC Correct> Conf LC Correct, Table 2                | Memory   | Retrospective         | Parametric        | Confidence                    | Pos | Func | MNI |
|                                                                                                                                                                                                                                                              |    | Conf HC Incorrect> Conf LC Incorrect, Table 2            | Memory   | Retrospective         | Parametric        | Confidence                    | Pos | Func | MNI |
|                                                                                                                                                                                                                                                              |    | Confidence assessment>recognition, Table 2               | Memory   | Retrospective         | Judgement-Related | Confidence                    | N/A | Func | MNI |
| Chua, E. F., Schacter, D. L., & Sperling, R. A. (2009). Neural basis for recognition confidence in younger and older adults. <i>Psychology and Aging</i> , 24(1), 139–153.                                                                                   | 16 | Regions significant for HC in young but not old, Table 3 | Memory   | Retrospective         | Parametric        | Confidence                    | Pos | Func | MNI |
|                                                                                                                                                                                                                                                              |    | Regions significant for LC compared to HC, Table 2       | Memory   | Retrospective         | Parametric        | Confidence                    | Neg | Func | MNI |
| Chua, E. F., Schacter, D. L., & Sperling, R. A. (2009). Neural correlates of metamemory: a comparison of feeling-of-knowing and retrospective confidence judgments. <i>Journal of Cognitive Neuroscience</i> , 21(9), 1751–65.                               | 13 | Metamemory>Non-metamemory, Table 2                       | Memory   | Both grouped together | Judgement-Related | Feeling of Knowing+Confidence | N/A | Func | MNI |
|                                                                                                                                                                                                                                                              |    | Metamemory>Recognition, Table 2                          | Memory   | Both grouped together | Judgement-Related | Feeling of Knowing+Confidence | N/A | Func | MNI |
|                                                                                                                                                                                                                                                              |    | FOK> non-metamemory, Table 2                             | Memory   | Prospective           | Judgement-Related | Feeling of Knowing            | N/A | Func | MNI |
| De Martino, B., Fleming, S. M., Garrett, N., & Dolan, R. J. (2013). Confidence in value-based choice. <i>Nature Neuroscience</i> , 16(1), 105–10.                                                                                                            | 20 | Confidence increase, Supplementary Table 3               | Decision | Retrospective         | Parametric        | Confidence                    | Pos | Func | MNI |
|                                                                                                                                                                                                                                                              |    | Confidence decrease, Supplementary Table 3               | Decision | Retrospective         | Parametric        | Confidence                    | Pos | Func | MNI |
| Do Lam, A. T. A., Axmacher, N., Fell, J., Staresina, B. P., Gauggel, S., Wagner, T., Olligs, J. & Weis, S. (2012). Monitoring the Mind: The Neurocognitive Correlates of Metamemory. <i>PLoS ONE</i> , 7(1), e30009.                                         | 17 | JOL predicting memory formation, Table 1                 | Memory   | Prospective           | Parametric        | Judgement of Learning         | N/A | Func | MNI |
| Elman, J. A., Klostermann, E. C., Marian, D. E., Verstaen, A., & Shimamura, A. P. (2012). Neural correlates of metacognitive monitoring during episodic and semantic retrieval. <i>Cognitive, Affective, &amp; Behavioral Neuroscience</i> , 12(3), 599–609. | 19 | Episodic Definitely>Likely/Maybe, Table 3                | Memory   | Prospective           | Parametric        | Feeling of Knowing            | Pos | Func | MNI |
|                                                                                                                                                                                                                                                              |    | Semantic Definitely>Likely/Maybe, Table 3                | Memory   | Prospective           | Parametric        | Feeling of Knowing            | Pos | Func | MNI |
|                                                                                                                                                                                                                                                              |    | Episodic Likely/Maybe>Definitely, Table 4                | Memory   | Prospective           | Parametric        | Feeling of Knowing            | Pos | Func | MNI |
|                                                                                                                                                                                                                                                              |    | Semantic Likely/Maybe>Definitely, Table 4                | Memory   | Prospective           | Parametric        | Feeling of Knowing            | Pos | Func | MNI |

|                                                                                                                                                                                                                                                                                         |    |                                                                                           |          |               |                           |             |          |        |     |
|-----------------------------------------------------------------------------------------------------------------------------------------------------------------------------------------------------------------------------------------------------------------------------------------|----|-------------------------------------------------------------------------------------------|----------|---------------|---------------------------|-------------|----------|--------|-----|
| Fleming, S. M., Weil, R. S., Nagy, Z., Dolan, R. J., & Rees, G. (2010). Relating introspective accuracy to individual differences in brain structure. <i>Science</i> , 329(5998), 1541–1543.                                                                                            | 31 | FA associated with $A_{roc}$ , Table S3                                                   | Decision | Retrospective | Metacognitive sensitivity | Confidence  | Pos/Neg  | Struct | MNI |
|                                                                                                                                                                                                                                                                                         |    | GM associated with $A_{roc}$ , Table S2                                                   | Decision | Retrospective | Metacognitive sensitivity | Confidence  | Pos/Neg  | Struct | MNI |
| Fleming, S. M., Huijgen, J., & Dolan, R. J. (2012). Prefrontal Contributions to Metacognition in Perceptual Decision Making. <i>Journal of Neuroscience</i> , 32(18), 6117–6125.                                                                                                        | 23 | Report>Follow, Table 1                                                                    | Decision | Retrospective | Judgement-Related         | Confidence  | N/A      | Func   | MNI |
|                                                                                                                                                                                                                                                                                         |    | Correlation with reported confidence, Table 2                                             | Decision | Retrospective | Parametric                | Confidence  | Neg      | Func   | MNI |
| Harsay, H. A., Spaan, M., Wijnen, J. G., & Ridderinkhof, K. R. (2012). Error Awareness and Salience Processing in the Oddball Task: Shared Neural Mechanisms. <i>Frontiers in Human Neuroscience</i> , 6, 246.                                                                          | 14 | Complete list of areas with significant BOLD during aware versus unaware errors, Table A1 | Decision | Retrospective | Parametric                | Aware Error | N/A      | Func   | MNI |
| Hayes, S. M., Buchler, N., Stokes, J., Kragel, J., & Cabeza, R. (2011). Neural correlates of confidence during item recognition and source memory retrieval: evidence for both dual-process and strength memory theories. <i>Journal of Cognitive Neuroscience</i> , 23(12), 3959-3971. | 16 | High> Low confidence, Table 2                                                             | Memory   | Retrospective | Parametric                | Confidence  | Pos      | Func   | MNI |
|                                                                                                                                                                                                                                                                                         |    | Low>High confidence, Table 2                                                              | Memory   | Retrospective | Parametric                | Confidence  | Pos      | Func   | MNI |
| Hebart, M. N., Schriever, Y., Donner, T. H., & Haynes, J.-D. (2016). The Relationship between Perceptual Decision Variables and Confidence in the Human Brain. <i>Cerebral Cortex</i> , 26(1), 118–130.                                                                                 | 18 | Brain regions where activity is related to confidence, Table 1                            | Decision | Retrospective | Parametric                | Confidence  | Pos, Neg | Func   | MNI |
| Heereman, J., Walter, H., & Heekeren, H. R. (2015). A task-independent neural representation of subjective certainty in visual perception. <i>Frontiers in Human Neuroscience</i> , 9, 551.                                                                                             | 20 | Significant correlations with subjective certainty in color trials, Table 2               | Decision | Retrospective | Parametric                | Confidence  | Pos, Neg | Func   | MNI |
|                                                                                                                                                                                                                                                                                         |    | Significant correlations with subjective certainty in motion trials, Table 3              | Decision | Retrospective | Parametric                | Confidence  | Pos, Neg | Func   | MNI |
|                                                                                                                                                                                                                                                                                         |    | Task-independent significant correlations with subjective certainty, Table 4              | Decision | Retrospective | Parametric                | Confidence  | Pos, Neg | Func   | MNI |
| Henson, R. N., Rugg, M. D., Shallice, T., & Dolan, R. J. (2000). Confidence in Recognition Memory for Words: Dissociating Right Prefrontal Roles in Episodic Retrieval. <i>Journal of</i>                                                                                               | 12 | Low > High Confidence, Figure 2                                                           | Memory   | Retrospective | Parametric                | Confidence  | Pos      | Func   | MNI |

|                                                                                                                                                                                                                                                                                          |    |                                                                                  |          |               |                               |                       |          |      |     |
|------------------------------------------------------------------------------------------------------------------------------------------------------------------------------------------------------------------------------------------------------------------------------------------|----|----------------------------------------------------------------------------------|----------|---------------|-------------------------------|-----------------------|----------|------|-----|
| <i>Cognitive Neuroscience</i> , 12(6), 913–923.                                                                                                                                                                                                                                          |    |                                                                                  |          |               |                               |                       |          |      |     |
| Hester, R., Foxe, J. J., Molholm, S., Shpaner, M., & Garavan, H. (2005). Neural mechanisms involved in error processing: A comparison of errors made with and without awareness. <i>NeuroImage</i> , 27, 602–608                                                                         | 13 | Event-related activation during aware errors, Table 1                            | Decision | Retrospective | Parametric, Judgement-Related | Aware Error           | N/A      | Func | MNI |
| Hester, R., Nestor, L., & Garavan, H. (2009). Impaired Error Awareness and Anterior Cingulate Cortex Hypoactivity in Chronic Cannabis Users. <i>Neuropsychopharmacology</i> , 34(11), 2450–2458.                                                                                         | 32 | Aware errors>unaware errors, Table 3                                             | Decision | Retrospective | Parametric, Judgement-Related | Aware Error           | N/A      | Func | MNI |
| Hilgenstock, R., Weiss, T., & Witte, O. W. (2014). You’d Better Think Twice: Post-Decision Perceptual Confidence. <i>NeuroImage</i> , 99, 323–331                                                                                                                                        | 24 | Regions involved in decisional confidence processing, Table 1                    | Decision | Retrospective | Parametric                    | Confidence            | Neg      | Func | MNI |
| Huijbers, W., Papp, K. V., LaPoint, M., Wigman, S. E., Dagley, A., Hedden, T., Rentz, D.M., Schultz, A.P. & Sperling, R. A. (2016). Age-Related Increases in Tip-of-the-tongue are Distinct from Decreases in Remembering Names: A Functional MRI Study. <i>Cerebral Cortex</i> , 1(11). | 73 | TOT > (REC +FOK + UNK), Figure 3C                                                | Memory   | Prospective   | Parametric                    | Tip of the Tongue     | Pos      | Func | MNI |
| Kao, Y.-C., Davis, E. S., & Gabrieli, J. D. E. (2005). Neural correlates of actual and predicted memory formation. <i>Nature Neuroscience</i> , 8(12), 1776–1783.                                                                                                                        | 16 | Predicted encoding success, Table 1                                              | Memory   | Prospective   | Parametric                    | Judgement of Learning | Pos      | Func | MNI |
| Kikyo, H., Ohki, K., & Sekihara, K. (2001). Temporal characterization of memory retrieval processes: an fMRI study of the ‘tip of the tongue’ phenomenon. <i>European Journal of Neuroscience</i> , 14(5), 887-892.                                                                      | 14 | Hit on>give up, Table 1                                                          | Memory   | Prospective   | Parametric                    | Tip of the Tongue     | Pos      | Func | MNI |
| Kikyo, H., Ohki, K., & Miyashita, Y. (2002). Neural Correlates for Feeling-of-Knowing: An fMRI Parametric Analysis. <i>Neuron</i> , 36(1), 177–186                                                                                                                                       | 14 | Regions parametrically modulated by FOK with double parametric analysis, Table 2 | Memory   | Prospective   | Parametric                    | Feeling of Knowing    | Pos      | Func | MNI |
| Kikyo, H., & Miyashita, Y. (2004). Temporal lobe activations of “feeling-of-knowing” induced by face-name associations. <i>NeuroImage</i> , 23(4), 1348–1357.                                                                                                                            | 15 | Brain regions parametrically modulated by the FOK, Table 1                       | Memory   | Prospective   | Parametric                    | Feeling of Knowing    | Pos      | Func | MNI |
| Kim, H., & Cabeza, R. (2007). Trusting Our Memories: Dissociating the Neural Correlates of Confidence in                                                                                                                                                                                 | 11 | HC-TR> LC-TR and LC-FR >HC-FR, Table 3                                           | Memory   | Retrospective | Metacognitive sensitivity     | Confidence            | Pos, Neg | Func | T88 |
|                                                                                                                                                                                                                                                                                          |    | LC-TR> HC-TR and HC-                                                             | Memory   | Retrospective | Metacognitive                 | Confidence            | Pos, Neg | Func | T88 |

|                                                                                                                                                                                                                                 |    |                                                                 |          |               |             |                    |     |      |     |
|---------------------------------------------------------------------------------------------------------------------------------------------------------------------------------------------------------------------------------|----|-----------------------------------------------------------------|----------|---------------|-------------|--------------------|-----|------|-----|
| Veridical versus Illusory Memories.<br><i>Journal of Neuroscience</i> , 27(45).                                                                                                                                                 |    | FR> LC-FR, Table 3                                              |          |               | Sensitivity |                    |     |      |     |
|                                                                                                                                                                                                                                 |    | True Recognition High-confidence> Low-Confidence, Table 2       | Memory   | Retrospective | Parametric  | Confidence         | Pos | Func | T88 |
|                                                                                                                                                                                                                                 |    | True Recognition Low-confidence> High confidence, Table 2       | Memory   | Retrospective | Parametric  | Confidence         | Pos | Func | T88 |
|                                                                                                                                                                                                                                 |    | False Recognition High confidence> Low confidence, Table 2      | Memory   | Retrospective | Parametric  | Confidence         | Pos | Func | T88 |
|                                                                                                                                                                                                                                 |    | False Recognition Low confidence> High confidence, Table 2      | Memory   | Retrospective | Parametric  | Confidence         | Pos | Func | T88 |
| Kim, H., & Cabeza, R. (2009). Common and specific brain regions in high- versus low-confidence recognition memory. <i>Brain Research</i> , 1282, 103–13.                                                                        | 12 | HCR activity, Table 2                                           | Memory   | Retrospective | Parametric  | Confidence         | Pos | Func | T88 |
|                                                                                                                                                                                                                                 |    | LCR activity, Table 2                                           | Memory   | Retrospective | Parametric  | Confidence         | Pos | Func | T88 |
| Klein, T. A., Endrass, T., Kathmann, N., Neumann, J., von Cramon, D. Y., & Ullsperger, M. (2007). Neural correlates of error awareness. <i>Neuroimage</i> , 34(4), 1774-1781.                                                   | 13 | Conscious error awareness, Table 3                              | Decision | Retrospective | Parametric  | Aware Error        | Pos | Func | T88 |
| Kuchinke, L., Fritzscheier, S., Hofmann, M. J., & Jacobs, A. M. (2013). Neural correlates of episodic memory: associative memory and confidence drive hippocampus activations. <i>Behavioural brain research</i> , 254, 92-101. | 20 | Significantly greater BOLD for high and low confidence, Table 4 | Memory   | Retrospective | Parametric  | Confidence         | Pos | Func | MNI |
| Maril, A., Wagner, A. D., & Schacter, D. L. (2001). On the tip of the tongue: An event-related fMRI study of semantic retrieval failure and cognitive conflict. <i>Neuron</i> , 31(4), 653-660.                                 | 14 | TOT-Selective Response, Figure 1                                | Memory   | Prospective   | Parametric  | Tip of the Tongue  | Pos | Func | MNI |
| Maril, A., Simons, J. S., Mitchell, J. P., Schwartz, B. L., & Schacter, D. L. (2003). Feeling-of-knowing in episodic memory: an event-related fMRI study. <i>Neuroimage</i> , 18(4), 827-836.                                   | 17 | K>FOK>DK, Table 2                                               | Memory   | Prospective   | Parametric  | Feeling of Knowing | Pos | Func | MNI |
|                                                                                                                                                                                                                                 |    | K=FOK>DK, Table 2                                               | Memory   | Prospective   | Parametric  | Feeling of Knowing | Pos | Func | MNI |
| Maril, A., Simons, J. S., Weaver, J. J., & Schacter, D. L. (2005). Graded recall success: An event-related fMRI                                                                                                                 | 15 | TOT>all else, Table 3                                           | Memory   | Prospective   | Parametric  | Tip of the Tongue  | N/A | Func | MNI |

|                                                                                                                                                                                                                                              |    |                                                                              |          |               |                               |                        |     |       |     |
|----------------------------------------------------------------------------------------------------------------------------------------------------------------------------------------------------------------------------------------------|----|------------------------------------------------------------------------------|----------|---------------|-------------------------------|------------------------|-----|-------|-----|
| comparison of tip of the tongue and feeling of knowing. <i>Neuroimage</i> , 24(4), 1130-1138.                                                                                                                                                |    | TOT=FOK>all else, Table 3                                                    | Memory   | Prospective   | Parametric                    | Tip of the Tongue      | N/A | Func  | MNI |
| McCurdy, L. Y., Maniscalco, B., Metcalfe, J., Liu, K. Y., de Lange, F. P., & Lau, H. (2013). Anatomical coupling between distinct metacognitive systems for memory and visual perception. <i>Journal of Neuroscience</i> , 33(5), 1897-1906. | 34 | meta-d'/d' for vision                                                        | Decision | Retrospective | Metacognitive sensitivity     | Confidence             | Pos | Struc | MNI |
|                                                                                                                                                                                                                                              |    | meta-d'/d' for memory                                                        | Memory   | Retrospective | Metacognitive sensitivity     | Confidence             | Pos | Struc | MNI |
| Moritz, S., Gläscher, J., Sommer, T., Büchel, C., & Braus, D. F. (2006). Neural correlates of memory confidence. <i>Neuroimage</i> , 33(4), 1188-1193.                                                                                       | 17 | Activation pattern for high-confidence vs. low-confidence responses, Table 1 | Memory   | Retrospective | Parametric                    | Confidence             | Pos | Func  | MNI |
|                                                                                                                                                                                                                                              |    | Low-confidence vs. high-confidence, Table 1                                  | Memory   | Retrospective | Parametric                    | Confidence             | Pos | Func  | MNI |
| Orr, C., & Hester, R. (2012). Error-related anterior cingulate cortex activity and the prediction of conscious error awareness. <i>Frontiers in human neuroscience</i> , 6, 177.                                                             | 56 | Greater BOLD for aware than unaware errors, Table 2                          | Decision | Retrospective | Parametric, Judgement-Related | Aware Error            | Pos | Func  | MNI |
| Paul, E. J., Smith, J. D., Valentin, V. V., Turner, B. O., Barbey, A. K., & Ashby, F. G. (2015). Neural networks underlying the metacognitive uncertainty response. <i>Cortex</i> , 71, 306-322.                                             | 29 | Uncertainty>correct categorization contrast, Table 3                         | Decision | Retrospective | Judgement-Related             | Uncertainty Response   | N/A | Func  | MNI |
| Plailly, J., Tillmann, B., & Royet, J. P. (2007). The feeling of familiarity of music and odors: the same neural signature?. <i>Cerebral cortex</i> , 17(11), 2650-2658.                                                                     | 13 | Significant for bimodal familiar compared to unfamiliar, Table 1             | Memory   | Retrospective | Parametric                    | Feeling of Familiarity | Pos | Func  | MNI |
|                                                                                                                                                                                                                                              |    | Bimodal activations evoked by feelings of unfamiliarity, Table 2             | Memory   | Retrospective | Parametric                    | Feeling of Familiarity | Neg | Func  | MNI |
| Reggev, N., Zuckerman, M., & Maril, A. (2011). Are all judgments created equal?: An fMRI study of semantic and episodic metamemory predictions. <i>Neuropsychologia</i> , 49(5), 1332-1342.                                                  | 18 | Gray matter regions modulated by predictive judgements, Table 3              | Memory   | Prospective   | Parametric                    | Feeling of Knowing     | Pos | Func  | MNI |
| Risius, U. M., Staniloiu, A., Piefke, M., Maderwald, S., Schulte, F., Brand, M., & Markowitsch, H. J. (2013). Retrieval, monitoring, and control processes: a 7 tesla FMRI approach to memory accuracy. <i>Frontiers in</i>                  | 29 | High confidence>Low confidence, Table 2 (A)                                  | Memory   | Retrospective | Parametric                    | Confidence             | Pos | Func  | MNI |

|                                                                                                                                                                                                                                                                               |     |                                                                        |          |               |                           |                    |     |       |     |
|-------------------------------------------------------------------------------------------------------------------------------------------------------------------------------------------------------------------------------------------------------------------------------|-----|------------------------------------------------------------------------|----------|---------------|---------------------------|--------------------|-----|-------|-----|
| <i>behavioral neuroscience</i> , 7, 24.                                                                                                                                                                                                                                       |     | Low confidence>High confidence, Table 2 (B)                            | Memory   | Retrospective | Parametric                | Confidence         | Pos | Func  | MNI |
|                                                                                                                                                                                                                                                                               |     | Monitoring greater than retrieval, Table 4                             | Memory   | Retrospective | Judgement-Related         | Confidence         | N/A | Func  | MNI |
| Schnyer, D. M., Nicholls, L., & Verfaellie, M. (2005). The role of VMPC in metamemorial judgments of content retrievability. <i>Journal of cognitive neuroscience</i> , 17(5), 832-846.                                                                                       | 19  | Brain regions linearly modulated by 1-4 rating, Table 3                | Memory   | Prospective   | Parametric                | Feeling of Knowing | Pos | Func  | MNI |
|                                                                                                                                                                                                                                                                               |     | Regions associated with all accurate retrieval judgements, Table 2 (c) | Memory   | Prospective   | Metacognitive sensitivity | Feeling of Knowing | N/A | Func  | MNI |
| Sinanaj, I., Cojan, Y., & Vuilleumier, P. (2015). Inter-individual variability in metacognitive ability for visuomotor performance and underlying brain structures. <i>Consciousness and Cognition</i> , 36, 327-337.                                                         | 29  | Gray matter positive correlation with Mratio, Figure 3                 | Decision | Retrospective | Metacognitive sensitivity | Confidence         | Pos | Struc | MNI |
|                                                                                                                                                                                                                                                                               |     | Gray matter negative correlation with MRatio                           | Decision | Retrospective | Metacognitive sensitivity | Confidence         | Neg | Struc | MNI |
| Valk, S. L., Bernhardt, B. C., Böckler, A., Kanske, P., & Singer, T. (2016). Substrates of metacognition on perception and metacognition on higher-order cognition relate to different subsystems of the mentalizing network. <i>Human Brain Mapping</i> , 37(10), 3388-3399. | 151 | MC-P: Cortical thickness, Supplementary Table 1                        | Decision | Retrospective | Metacognitive sensitivity | Confidence         | N/A | Struc | MNI |

|                                                                                                                                                                                                                       |    |                                                           |          |               |                           |                       |          |       |     |
|-----------------------------------------------------------------------------------------------------------------------------------------------------------------------------------------------------------------------|----|-----------------------------------------------------------|----------|---------------|---------------------------|-----------------------|----------|-------|-----|
|                                                                                                                                                                                                                       |    | MC-P Fractional anisotropy, Supplementary Table 1         | Decision | Retrospective | Metacognitive sensitivity | Confidence            | N/A      | Struc | MNI |
| Wan, X., Cheng, K., & Tanaka, K. (2016). The Neural System of Postdecision Evaluation in Rostral Frontal Cortex during Problem-solving Tasks. <i>eNeuro</i> , 3(4), ENEURO-0188.                                      | 34 | Post-task activation, Table 1                             | Decision | Retrospective | Judgement-Related         | Confidence            | N/A      | Func  | T88 |
| Wu, S. W., Delgado, M. R., & Maloney, L. T. (2015). Gambling on visual performance: neural correlates of metacognitive choice between visual lotteries. <i>Frontiers in Neuroscience</i> , 9, 314.                    | 19 | Reward probability, Table 1                               | Decision | Retrospective | Parametric                | Lottery               | Pos      | Func  | MNI |
| Yang, H., Cai, Y., Liu, Q., Zhao, X., Wang, Q., Chen, C., & Xue, G. (2015). Differential neural correlates underlie judgment of learning and subsequent memory performance. <i>Frontiers in Psychology</i> , 6, 1699. | 26 | Higher JOL, Figure 3                                      | Memory   | Prospective   | Parametric                | Judgement of Learning | Pos      | Func  | MNI |
|                                                                                                                                                                                                                       |    | Effect of JOL accuracy on subsequent JOL effect, Figure 4 | Memory   | Prospective   | Metacognitive Sensitivity | Gamma                 | Neg      | Func  | MNI |
|                                                                                                                                                                                                                       |    | PPI analysis higher JOL, Figure 6C                        | Memory   | Prospective   | Parametric                | Judgement of Learning | Pos, Neg | Func  | MNI |
|                                                                                                                                                                                                                       |    | Difference between memory and JOL effects, Figure 6D      | Memory   | Prospective   | Judgement-Related         | Judgement of Learning | N/A      | Func  | MNI |



|                                                                                                                                                                                                                                                                                                                                          |    |                                                                               |        |               |                           |            |     |      |     |
|------------------------------------------------------------------------------------------------------------------------------------------------------------------------------------------------------------------------------------------------------------------------------------------------------------------------------------------|----|-------------------------------------------------------------------------------|--------|---------------|---------------------------|------------|-----|------|-----|
| Yokoyama, O., Miura, N., Watanabe, J., Takemoto, A., Uchida, S., Sugiura, M., Horie, K., Sato, S., Kawashima, R. & Nakamura, K. (2010). Right frontopolar cortex activity correlates with reliability of retrospective rating of confidence in short-term recognition memory performance. <i>Neuroscience Research</i> , 68(3), 199-206. | 25 | Higher activity for confidence rating than brightness discrimination, Table 1 | Memory | Retrospective | Judgment-Related          | Confidence | N/A | Func | MNI |
|                                                                                                                                                                                                                                                                                                                                          |    | Signal change associated with higher gamma, Figure 4                          | Memory | Retrospective | Metacognitive sensitivity | Confidence | N/A | Func | MNI |

**Table S2.** Uncorrected findings for judgment-related and sensitivity-related contrasts. We applied an uncorrected threshold of  $p < .001$  with a minimum cluster size of  $200\text{mm}^3$ .

| Cluster            | Peak Coordinate (MNI) |     |     | Volume ( $\text{mm}^3$ ) | Region                                    | Maximum ALE Value |
|--------------------|-----------------------|-----|-----|--------------------------|-------------------------------------------|-------------------|
|                    | x                     | y   | z   |                          |                                           |                   |
| <b>Judgement</b>   |                       |     |     |                          |                                           |                   |
| 1                  | -50                   | -48 | 40  | 592                      | L Lateral parietal cortex                 | 0.0153            |
| 2                  | 0                     | 20  | 38  | 576                      | L/R Posterior medial frontal cortex       | 0.0161            |
| 3                  | 48                    | -48 | 40  | 464                      | R Lateral parietal cortex                 | 0.0171            |
| 4                  | 42                    | 14  | 2   | 320                      | R Insula                                  | 0.0135            |
| 5                  | 38                    | 42  | 28  | 232                      | R Anterior dorsolateral prefrontal cortex | 0.0113            |
| 6                  | 26                    | 62  | -4  | 224                      | R Anterior prefrontal cortex              | 0.0114            |
| 7                  | -62                   | -28 | 20  | 224                      | L Superior temporal gyrus                 | 0.0124            |
| <b>Sensitivity</b> |                       |     |     |                          |                                           |                   |
| 1                  | 32                    | 50  | 8   | 504                      | R Anterior prefrontal cortex              | 0.0176            |
| 2                  | -26                   | -36 | -14 | 448                      | L Parahippocampal cortex                  | 0.0169            |
| 3                  | 30                    | 16  | -18 | 288                      | R Insula                                  | 0.0120            |
| 4                  | 8                     | 42  | 44  | 272                      | R Dorsomedial prefrontal cortex           | 0.0114            |
| 5                  | 8                     | -58 | 20  | 240                      | R Precuneus                               | 0.0122            |

## Activations for **judgement-related** and **sensitivity-related** contrasts

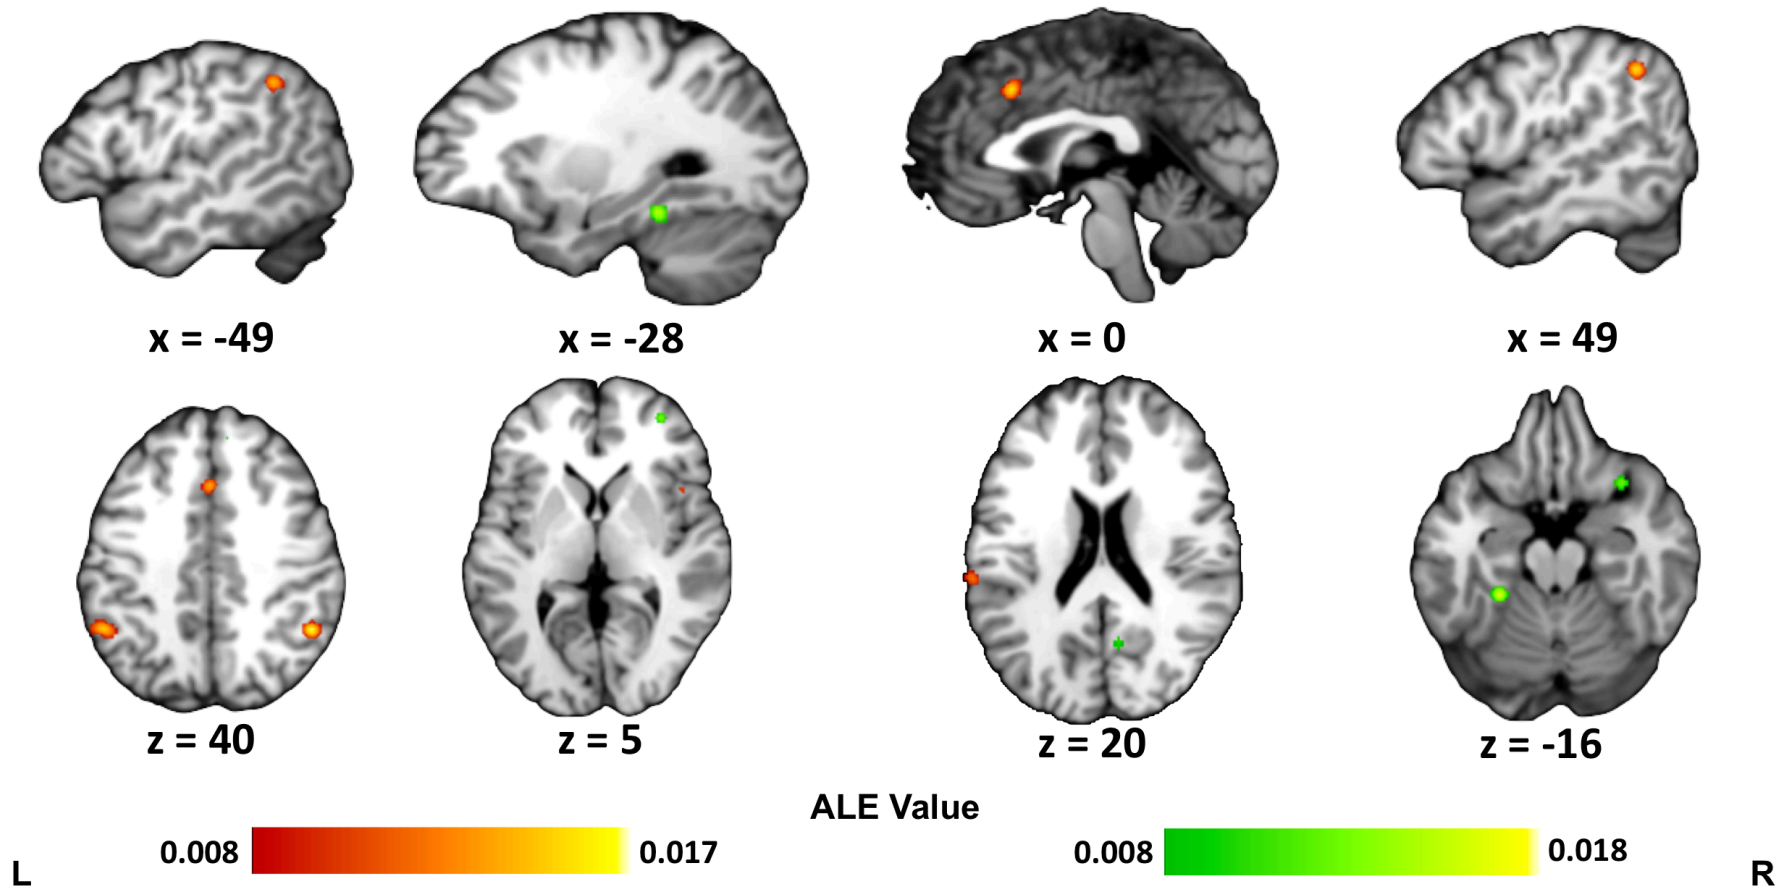

**Figure S1.** ALE results for contrasts of judgement-related activity (red) and metacognitive sensitivity-related activity (green). Clusters are displayed in MNI standard space. An uncorrected threshold of  $p < .001$  was used, with a minimum cluster size of  $200\text{mm}^3$ .
